# Supplementary material for: A hydrogen-bonding structure in self-formed nanodroplets of water adsorbed on amorphous silica revealed via surface-selective vibrational spectroscopy
Source: Royal Society of Chemistry journal article supplement (doi:10.1039/d0cp03207g), 2020-01-01
Supplement: d0cp03207g1.pdf [file d0cp03207g1.pdf]

*Supporting Information for*

Hydrogen-bonding structure in self-formed  
nanodroplets of water adsorbed on amorphous  
silica revealed by surface-selective vibrational  
spectroscopy

Shu-hei Urashima,<sup>†a,b</sup> Taku Uchida,<sup>†a</sup> and Hiroharu Yui<sup>\*a,b</sup>

<sup>a</sup> *Department of Chemistry, Faculty of Science, Tokyo University of Science, 1-3 Kagurazaka, Shinjuku, Tokyo 162–8601, Japan.*

<sup>b</sup> *Water Frontier Science & Technology Research Center, Research Institute for Science & Technology, Tokyo University of Science, 1-3 Kagurazaka, Shinjuku, Tokyo 162–8601, Japan.*

<sup>†</sup>Note: SU and TU are of equal contribution.

## 1. Phase-rotated $\text{Im}\chi^{(2)}$ spectra.

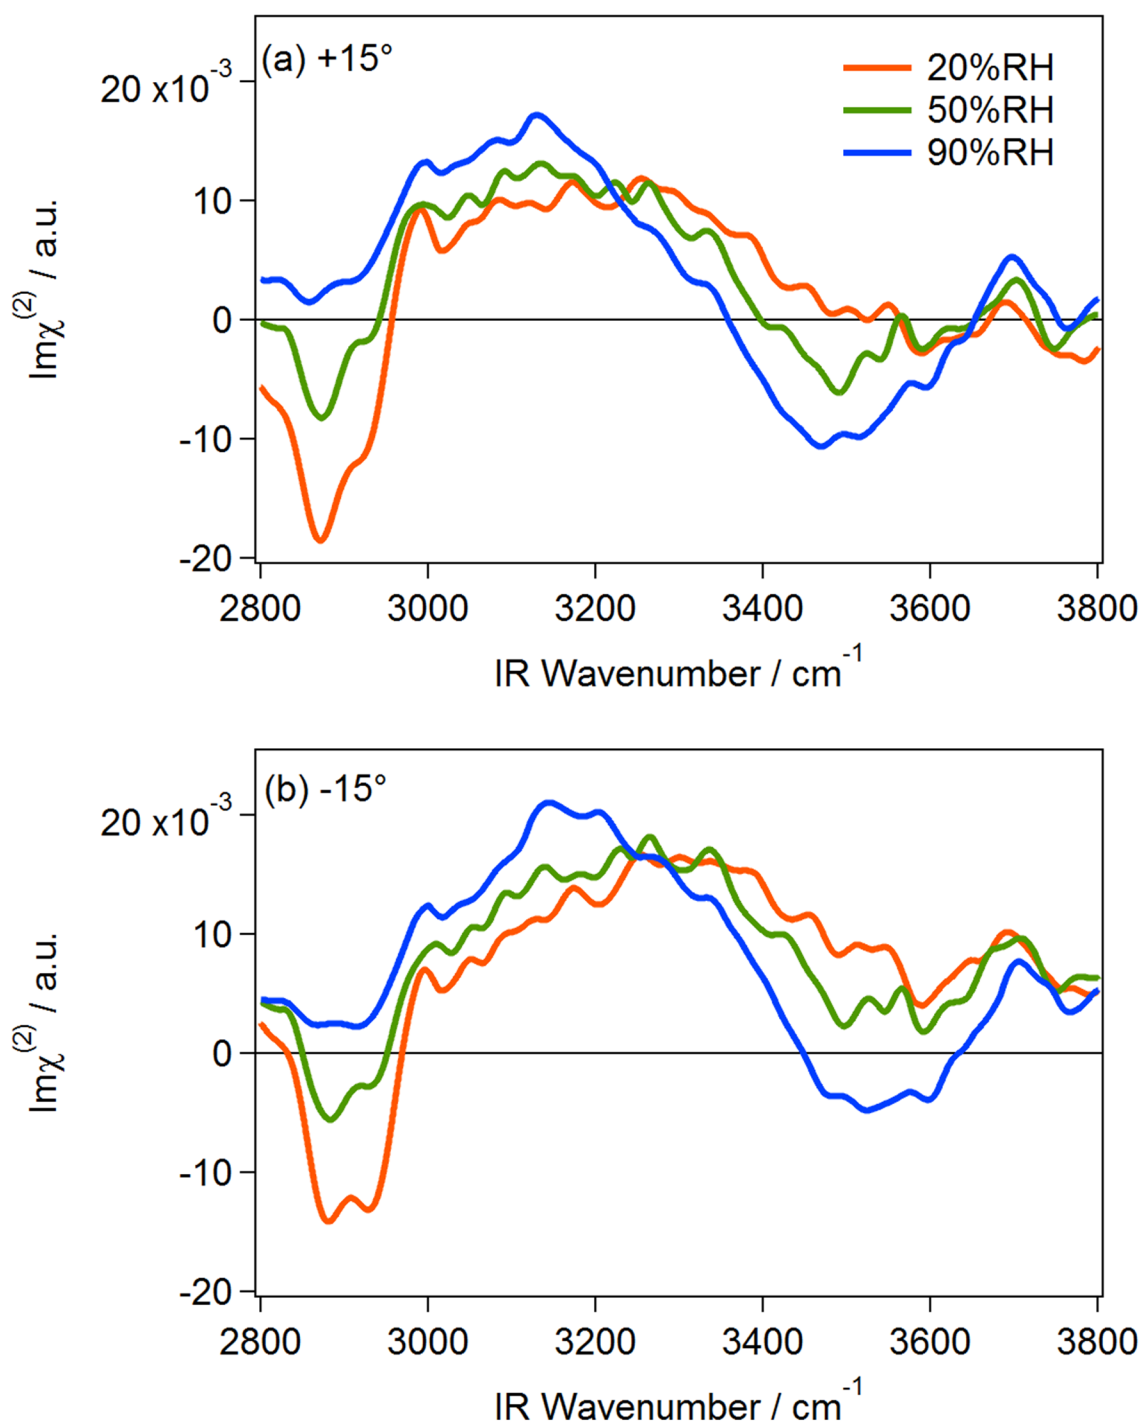

**Figure S1.**  $\text{Im}\chi^{(2)}$  spectra of the vapor/silica after phase rotation of (a)  $+15^\circ$  and (b)  $-15^\circ$ . The rotation angle of  $\pm 15^\circ$  is potential phase error. Note that essential feature of the spectra is unchanged even after the rotation.

2.  $|\chi^{(2)}|^2$  spectra reconstructed from complex  $\chi^{(2)}$ .

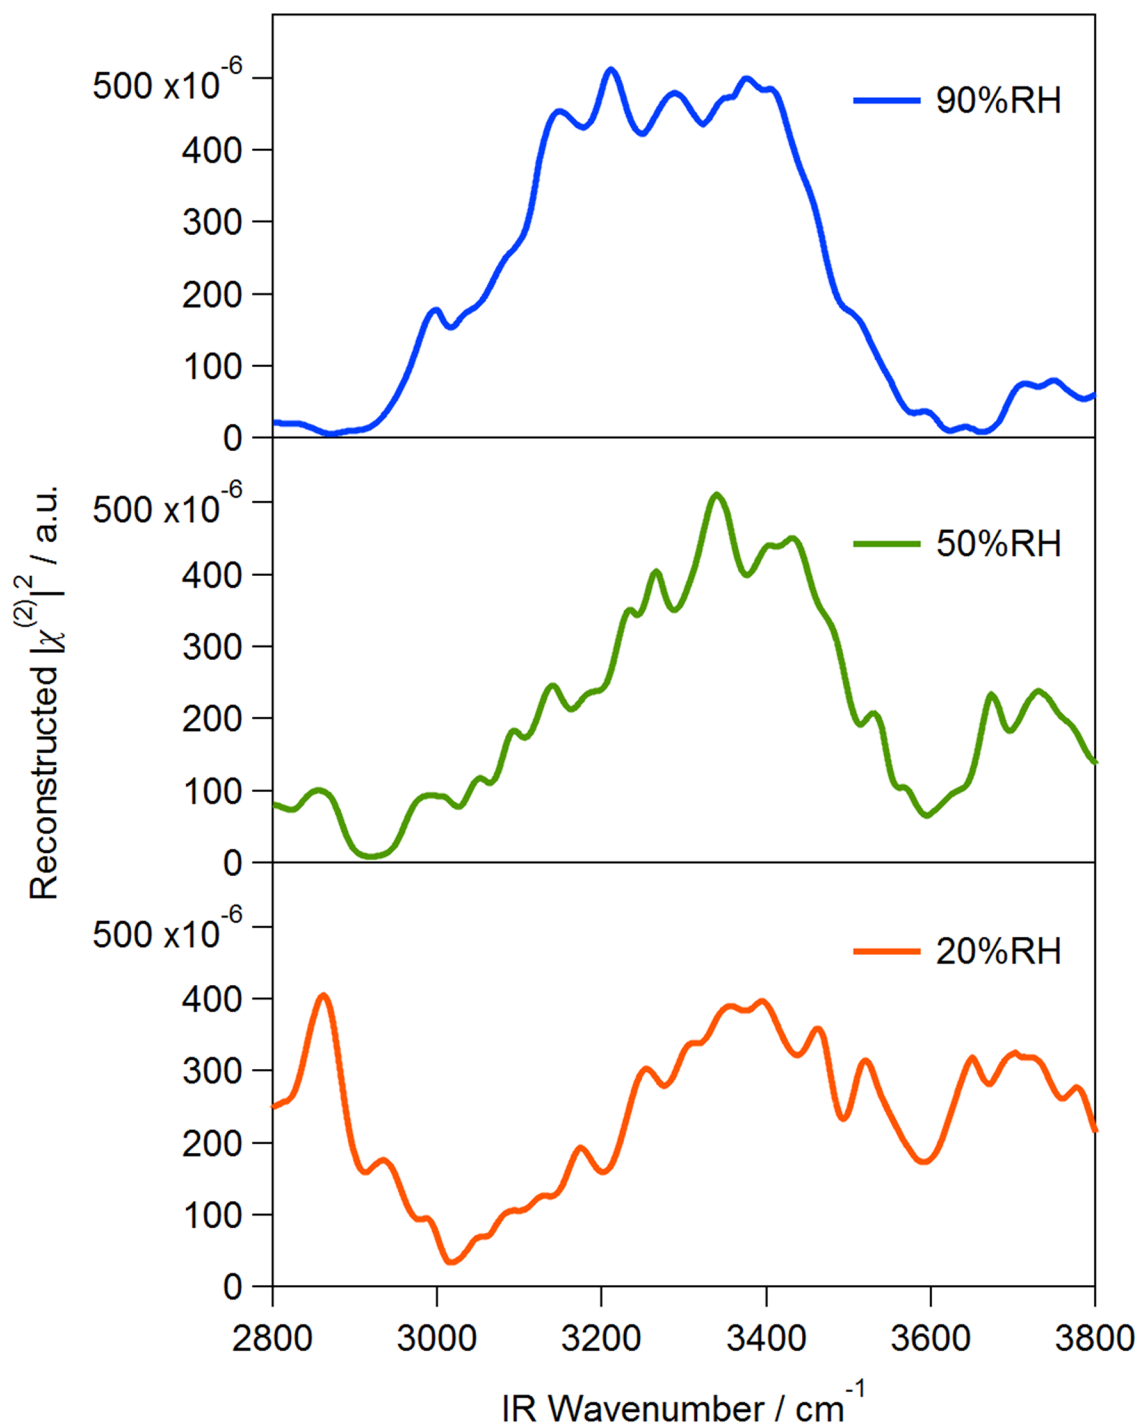

**Figure S2.**  $|\chi^{(2)}|^2$  spectra of the vapor/silica interface (reconstructed from complex  $\chi^{(2)}$  spectra).

### 3. Contact angle measurements

To confirm the cleanliness of the silica surface, we measured contact angle of silica several hours after the cleaning. It was measured with 2  $\mu\text{l}$  of water with drop shape analyzer (KRÜSS, DSA-25). We checked the contact angle 0-4 hours after the cleaning, and the silica substrate was cleaned by UV/ozone cleaner for 30 minutes each time after the contact angle measurements: for example, after the measurement of “1 hour after cleaning”, we again cleaned the sample and waited for 2 hours for “2 hour after cleaning”. This is because the silica got highly hydrophobic once the substrate gets wet and dried in the lab air. The measurements were repeated four times to obtain average and standard deviation.

As shown in Figure S3, the contact angle was about  $13^\circ$  even four hours after the cleaning, suggesting the silica kept hydrophilic in our measurement duration.

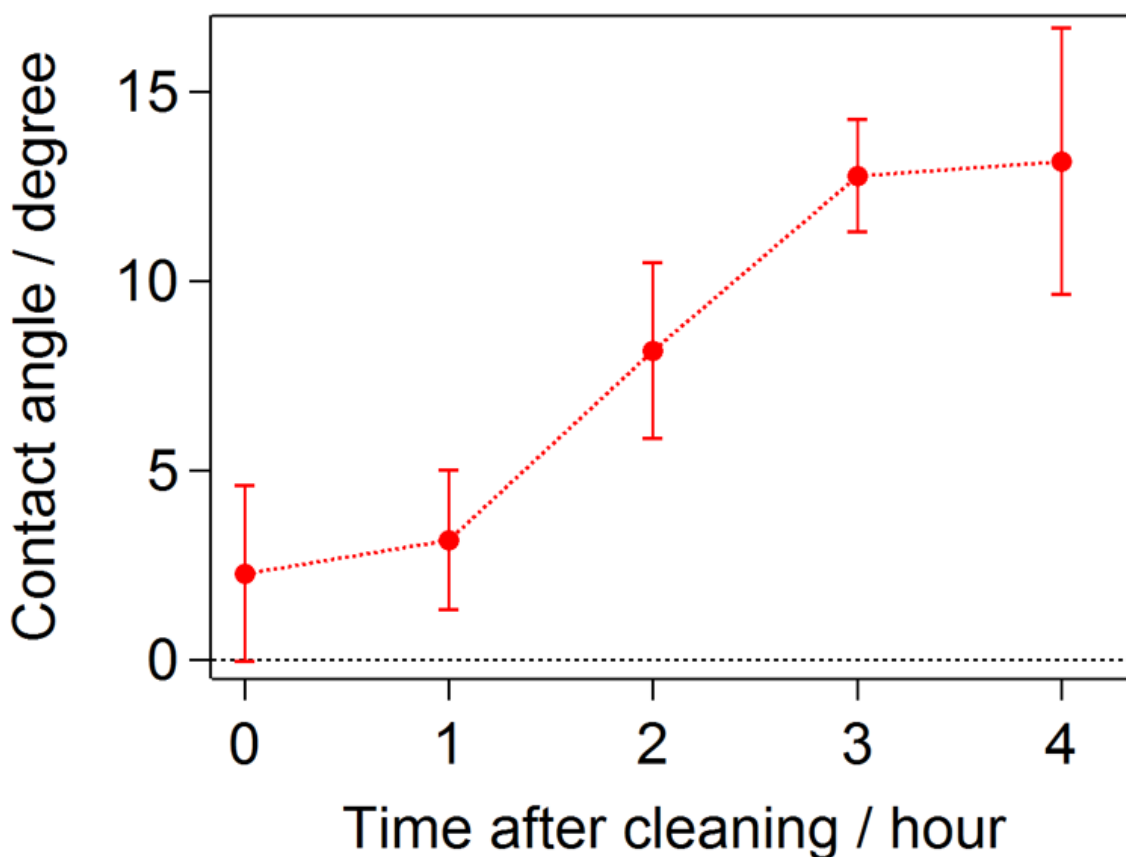

**Figure S3.** Time dependence of contact angle of the silica substrate. The contact angle was sometimes below detection-limit at 0 hour (just after the cleaning) and it was regarded as 0 degree for convenience. Error bars correspond standard deviation.

#### 4. Fresnel analysis

In the main text, we compared our  $\text{Im}\chi^{(2)}$  spectra with those evaluated in literature<sup>1</sup> (Ref. 11 in the main text). Because we found significant difference between them, it is necessary to check whether the difference is due to spectral distortion or not. Here we demonstrate that the spectral distortion is not crucial for the comparison.

In ssp- (our experimental configuration) and ppp-polarization (configuration in Ref. 11), what is observed, *i.e.* effective nonlinear susceptibility  $\chi_{\text{eff,ssp}}^{(2)}$  or  $\chi_{\text{eff,ppp}}^{(2)}$ , is described as:

$$\chi_{\text{eff,ssp}}^{(2)} = L_{3Y}L_{1Y}L_{2Z} \sin \theta_{2r} \chi_{YYZ}^{(2)} ,$$

or

$$\begin{aligned} \chi_{\text{eff,ppp}}^{(2)} = & -L_{3X} \cos \theta_{3r} \left( L_{1X}L_{2Z} \cos \theta_{1i} \sin \theta_{2i} \chi_{XXZ}^{(2)} + L_{1Z}L_{2X} \sin \theta_{1i} \cos \theta_{2i} \chi_{XZX}^{(2)} \right) \\ & + L_{3Z} \sin \theta_{3r} \left( L_{1X}L_{2X} \cos \theta_{1i} \cos \theta_{2i} \chi_{ZXX}^{(2)} + L_{1Z}L_{2Z} \sin \theta_{1i} \sin \theta_{2i} \chi_{ZZZ}^{(2)} \right) , \end{aligned}$$

where  $L_{1J}$ ,  $L_{2J}$ , and  $L_{3J}$  are Fresnel factors of incident visible, incident infrared, and generated sum-frequency (SF) lights, respectively (for  $J = X, Y, Z$ ).  $\theta_{1i}$ ,  $\theta_{2i}$ , and  $\theta_{3r}$  are incident (or reflection) angle of the visible, infrared, and SF lights.  $\chi_{IJK}^{(2)}$  is nonlinear susceptibility of the interface (for  $I, J, K = X, Y, Z$ ). Of these parameters, only  $L_{2X}$  and  $L_{2Z}$  can affect the spectral shape because the Fresnel factors are dependent on refractive index, which drastically varies at resonance.  $L_{2X}$  and  $L_{2Z}$  can be described as:

$$L_{2X} = \frac{2n_a \cos \theta_t}{n_a \cos \theta_t + n_b \cos \theta_i}$$

$$L_{2Z} = \frac{2n_b \cos \theta_r}{n_a \cos \theta_t + n_b \cos \theta_r} \left( \frac{n_a}{n'} \right)^2 ,$$

with

$$n' = \sqrt{\frac{n_a^2 + n_b^2 + 4}{2(n_a^{-2} + n_b^{-2} + 1)}} ,$$

where  $\theta_i$ ,  $\theta_r$ , and  $\theta_t$  are incident, reflected, and transmitted angle of infrared light.  $n_a$

and  $n_b$  are the refractive index of the incident phase and transmitted phase, respectively. Because air and silica are both non-resonant at the frequency range of 2800-3800  $\text{cm}^{-1}$ , Fresnel factors for air/silica system is to be constant. However, in fact, the refractive index of silica surface should be varied because of resonance of the adsorbed water. Because it is too complicate to estimate the refractive index of the interface with presence of the adsorbed water, here we calculated the Fresnel factors for silica/liquid water system as an ultimate model for the spectral distortion. As shown in Figure S4, Fresnel factor  $L_{2Z}$  in our experimental configuration (incident from air with angle of 50 degree with ssp polarization) is almost constant (Figure S4a). In the configuration of Ref. 11 (incident through silica with angle of 75 degree with ppp polarization), although neither  $L_{2Z}$  (Figure S4b) nor  $L_{2X}$  (Figure S4c) was constant, the curves are almost linear in the region of 3000-3700  $\text{cm}^{-1}$ . Because no peak-like feature was found unlike some of the previous studies<sup>2,3</sup>, we concluded that VSG spectra obtained by us and in Ref. 11 were nearly distortion free.

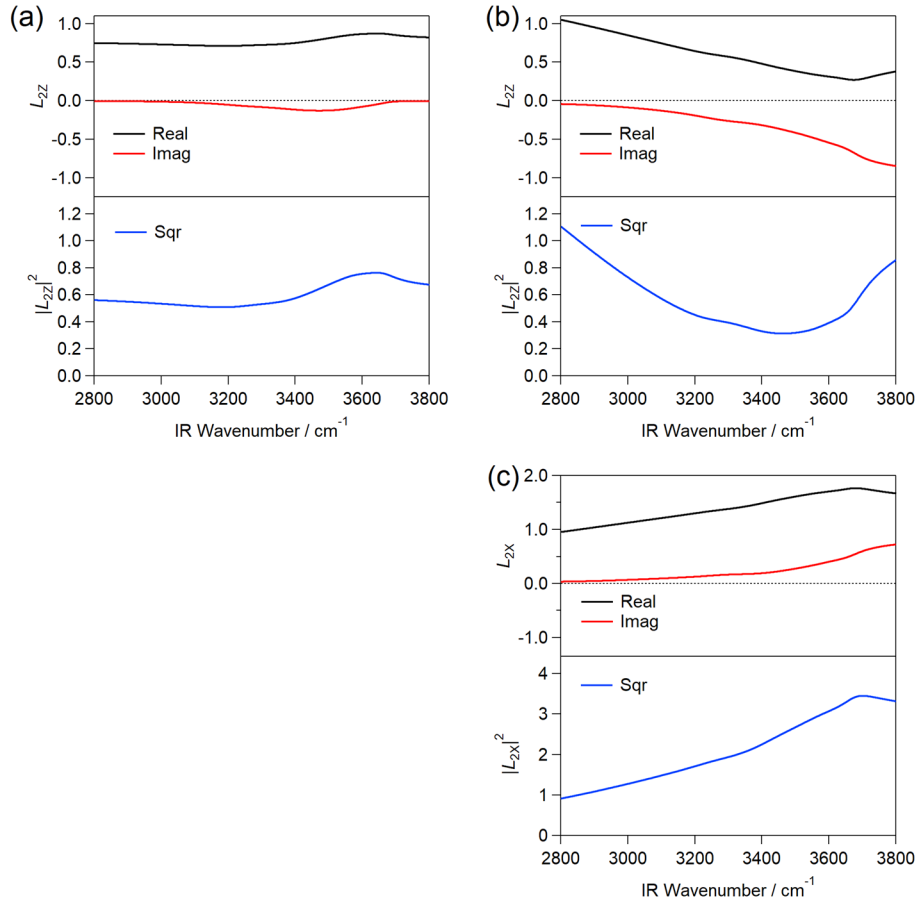

**Figure S4.** Calculated Fresnel factors of silica/liquid water interface. (a)  $L_{2Z}$  in our experimental configuration (laser is incident from air with angle of  $50^\circ$  ). (b, c)  $L_{2Z}$  and  $L_{2X}$  in configuration of Ref. 11 in the main text (laser is incident from silica with angle of  $75^\circ$  ).

## References

1. O. Isaienko and E. Borguet, *Langmuir*, 2013, **29**, 7885-7895.
2. E. H. G. Backus, N. Garcia-Araez, M. Bonn and H. J. Bakker, *J. Phys. Chem. C*, 2012, **116**, 23351-23361.
3. L. Wang, S. Nihonyanagi, K.-i. Inoue, K. Nishikawa, A. Morita, S. Ye and T. Tahara, *J. Phys. Chem. C*, 2019, **123**, 15665-15673.
